# Supplementary material for: Prediction of Fetal Darunavir Exposure by Integrating Human Ex-Vivo Placental Transfer and Physiologically Based Pharmacokinetic Modeling
Source: Springer Nature journal article supplement (doi:10.1007/s40262-017-0583-8), 2017-07-25
Supplement: MOESM1 [file 13326892]

**Placentas**

Placentas were obtained after uncomplicated vaginal delivery or elective caesarean section of healthy term pregnancies (> 38 weeks of gestation), with written informed consent of the mothers prior to delivery. Mothers took no medication interacting with darunavir or ritonavir. Exclusion criteria were HIV infection, hepatitis B, hepatitis C and multiple pregnancies. Placentas were visually inspected to ensure their integrity.

***Ex vivo* Perfusion of Human Placental Cotyledon**

Placentas were transported to the laboratory immediately after delivery, and the fetal and maternal circulation of a single cotyledon were established within 45 minutes. A well-defined fetal chorionic artery-vein pair was cannulated to form a complete vascular circuit and was then gently perfused with Krebs Henseleit buffer, pH = 7.2-7.4; (124mM NaCl, 4mM KCl, 0.95mM KH2PO4, 1.2mM MgSO4.7H2O, 20mM NaHCO3, 2mM CaCl2.2H2O and 11.1mM glucose) supplemented with 2500IU/L heparin and oxygenated with 95%O2/5%CO2. After confirmation of integrity of the cannulated fetal vascular circuit the maternal circulation was established by inserting four cannulas into the intervillous space. Fetal and maternal perfusate flow rates were 6 and 12mL/min respectively; both circulations were initially left open for about 20 minutes to flush out residual blood. Throughout perfusion, temperature of the buffer was controlled at 37°C. Perfusion was discontinued if the vessels could not be cannulated, or in case the fetal venous flow rate was <6mL/min, indicating vascular leakage.

Two sets of experiments were done to study maternal-to-fetal transfer (MTF) and fetal-to-maternal transfer (FTM) of darunavir/ritonavir. The perfusion medium consisted of Krebs-Henseleit buffer supplemented with 30g/L human serum albumin, 2500IU/L heparin and oxygenated with 95%O2/5%CO2. All experiments were conducted in a closed-open configuration over a period of 150 (MTF) or 180 (FTM) minutes. The difference in perfusion time relates to the quantities of perfusate needed: maternal flow was twice as high as fetal flow. As preliminary data showed that 150 minutes of perfusion was sufficient to obtained transfer parameters, MTF perfusions were limited to 150 minutes. The donor compartment was operated in a closed configuration, in which perfusate outflow was recirculated. The receiving compartment was operated in an open (single-pass) configuration in which perfusate outflow was collected directly without recirculation.

In MTF experiments, darunavir (6mg/L), ritonavir (0.5mg/L) and antipyrine (100mg/L) were added to the maternal reservoir. Samples were collected from maternal and fetal compartments at fixed time points. After centrifugation, samples were stored at -20 °C until further analysis. For FTM experiments, the compounds were added to the fetal reservoir and placental transfer was carried out in the fetal-to-maternal direction.

Antipyrine, a freely diffusible marker molecule was used to confirm overlap of maternal and fetal circulations throughout the experiment. To consider an experiment successful, the antipyrine transfer ratio had to be ≥20% (1-3). In both MTF and FTM perfusions, FITC-dextran (36mg/L) was added to the fetal compartment. Because of its size (40kDa), it served as a marker for integrity of the capillary bed. A threshold of maternal-to-fetal FITC-dextran concentration ratio <3% was set (4). At the end of the experiment, the perfused cotyledon was cut from the remainder of the placenta, snap frozen, and stored at -80°C until further analysis of tissue drug concentrations.

Concentration-time profiles of the perfusion experiments were plotted using GraphPad Prism®, version 5.03 (GraphPad Software Inc., San Diego, CA, USA). Data are presented as mean ± standard deviation (SD).

**Homogenization of Placental Tissue**

Placental tissue was thawed and samples of about 1000±10 mg each were placed in a 14mL polystyrene round-bottom tube. Three mL cold, blank perfusion buffer, including albumin, was added and the tissue was homogenized using a T10 basic Ultra-Turrax® disperser (IKA, Germany). The rotor was introduced directly in the placental tissue, dispersing in pulses of 10 seconds followed by 10 seconds without dispersion, until completing 30 seconds of dispersion. During homogenization, the tube containing the sample was kept on ice. Homogenates were stored at -20°Cuntil further analysis of darunavir/ritonavir tissue concentrations.

**Determination of Drug Concentrations**

Antipyrine concentrations in perfusate were determined according to a method described by Brodie et al. (5). FITC-dextran concentrations were determined using a Fluorescence Multi-well Plate Reader (PerkinElmer®) with excitation and emission wavelength set at 485 nm and 530 nm, respectively.

Concentrations of darunavir and ritonavir were analyzed based on a validated method for determination of several HIV protease inhibitors in human plasma (6, 7). Briefly, darunavir, ritonavir, and internal standard (triazolam, 2.5mg/L) were extracted from perfusion samples with tert-butylmethyl ether. After evaporation and reconstitution in injection solvent, these analytes were quantified by ultra-high performance liquid chromatography coupled with UV detection at 215 nm. The processed samples (7.5µL) were injected on an Acquity UPLC BEH C18 column (2.1 x 50mm, 1.7µm; Waters®, Milford, MA, USA) maintained at 40oC. The mobile phase was a mixture (30:70) of 50 mM phosphate buffer (pH 5.60±0.02) and acetonitrile delivered at 0.55mL/min. The lower limit of quantification (LLOQ) was 0.10mg/L and 0.05mg/L for darunavir and ritonavir, respectively. The effective linear range of calibration was 0.10 to 29.83mg/L for darunavir and 0.045 to 29.83mg/L for ritonavir, with acceptable accuracy and precision (<15% deviation).

Placental tissue concentrations of darunavir and ritonavir were determined by the same UPLC-UV method. The analyte in the tissue homogenates was extracted with acetonitrile. Calibration stocks were made in blank non-perfused tissue homogenate. The effective linear range of calibration was 0.10 to 30.00mg/L for darunavir (R2=0.9997) and 0.01 to 2.50 mg/L for ritonavir (R2=0.9996). Accuracy and precision were not determined.

**Total and Unbound Darunavir**

Separation of protein-bound and unbound darunavir in the perfusion buffer was achieved by ultrafiltration (Amicon Centrifree®-30 K Filter System, Millipore Corp. Bedford, MA, USA), based on a previously validated method for determination of unbound darunavir concentrations in plasma (6). In brief, samples were injected onto the filter system and allowed to equilibrate for 60 minutes at 37oC to prevent altered drug protein binding. Samples were then centrifuged (1650g, 20 minutes, 37oC) to obtain ultrafiltrate containing the unbound drug. Unbound concentrations were measured at 6 different concentration levels using the same UPLC method as described above with LLOQ of 0.015mg/L (range 0.015–30mg/L).

**References**

1. Gavard L, Gil S, Peytavin G, Ceccaldi PF, Ferreira C, Farinotti R, et al. Placental transfer of lopinavir/ritonavir in the ex vivo human cotyledon perfusion model. Am J Obstet Gynecol. 2006;195(1):296-301.

2. Mandelbrot L, Duro D, Belissa E, Peytavin G. Placental transfer of darunavir in an ex vivo human cotyledon perfusion model. Antimicrob Agents Chemother. 2014;58(9):5617-20.

3. Gilboa SM, Broussard CS, Devine OJ, Duwe KN, Flak AL, Boulet SL, et al. Influencing clinical practice regarding the use of antiepileptic medications during pregnancy: modeling the potential impact on the prevalences of spina bifida and cleft palate in the United States. American journal of medical genetics Part C, Seminars in medical genetics. 2011;157C(3):234-46.

4. Schalkwijk S, Greupink R, Colbers AP, Wouterse AC, Verweij VG, van Drongelen J, et al. Placental transfer of the HIV integrase inhibitor dolutegravir in an ex vivo human cotyledon perfusion model. The Journal of antimicrobial chemotherapy. 2016;71(2):480-3.

5. Brodie BB, Axelrod J, et al. The estimation of antipyrine in biological materials. The Journal of biological chemistry. 1949;179(1):25-9.

6. Colbers A, Molto J, Ivanovic J, Kabeya K, Hawkins D, Gingelmaier A, et al. Pharmacokinetics of total and unbound darunavir in HIV-1-infected pregnant women. The Journal of antimicrobial chemotherapy. 2015;70(2):534-42.

7. Yazdy MM, Mitchell AA, Liu S, Werler MM. Maternal dietary glycaemic intake during pregnancy and the risk of birth defects. Paediatric and perinatal epidemiology. 2011;25(4):340-6.
